# Supplementary material for: Confined anodic aluminum oxide nanopores on aluminum wires
Source: Royal Society of Chemistry journal article supplement (doi:10.1039/c3ra47283c), 2014-01-01
Supplement: c3ra47283c.pdf [file c3ra47283c.pdf]

## Section S1:

### Ionic Efficiency

The ionic efficiency ( $\xi_i$ ) during anodization was calculated by correlating the wire radius from charge measurements to that from resistance measurements as shown in equations (1) and (2)

$$r_Q(t) = \sqrt{r_{init}^2 - \frac{\xi_i Q(t) Molwt(Al)}{zF \rho_{Al} \pi L}} \quad (1)$$

$$\Delta R = \frac{\rho L}{\pi} \left( \frac{1}{r_{\Omega}(t_2)^2} - \frac{1}{r_{\Omega}(t_1)^2} \right) \quad (2)$$

When  $\xi_i$  is 0.8, a good correlation is obtained between  $r_Q(t)$  – the radius of the remaining Al determined using charge passed and  $r_{\Omega}(t)$  – the radius determined using resistance measurements. The value of  $\xi_i = 0.8$  is near constant across all three anodization voltages. Fig. S1 shows that the best correlation between the wire radius through charge and resistance measurements using the calculated  $\xi_i$  of 0.8.

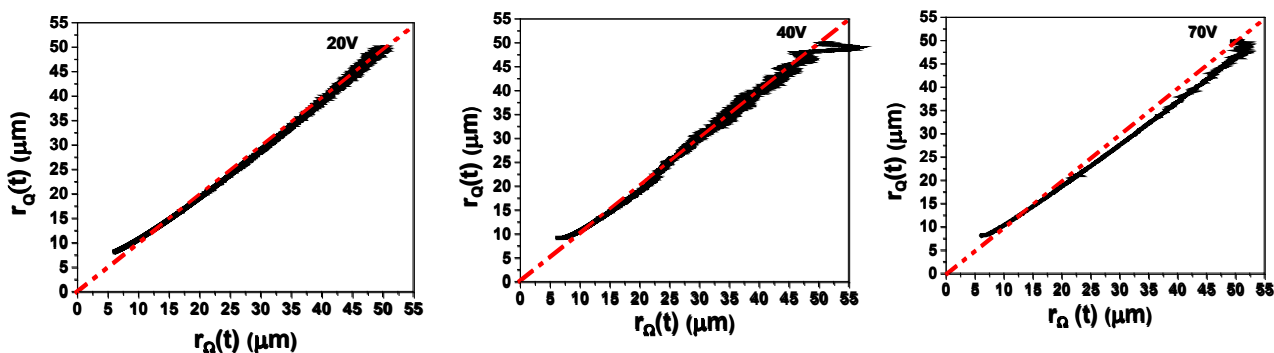

Fig S1: The bold line shows the correlation between the wire radius calculated from resistance measurements ( $r_{\Omega}(t)$ ) and that from charge measurements ( $r_Q(t)$ ) using an ionic efficiency of 0.8. The dotted line shows the linear for a perfect correlation.

**Section S2:**

**Calculation of error in ICP-OES due to electrolyte replenishment**

Volume of electrolyte = 688ml

At time, 't', 12ml of the electrolyte is withdrawn for ICP-OES.

Measured concentration of Al<sup>3+</sup> in electrolyte at time 't' (ICP-OES) =  $c_t$  g/ml

The electrolyte is then replenished by 12ml of fresh electrolyte to bring the volume back to 688ml

New concentration after replenishment at time 't' =  $(688c_t - 12c_t) / 688 = 0.983c_t$

Relative change in concentration after replenishment (%) = 1.7
